# Supplementary material for: 3’-UTR Polymorphisms of Vitamin B-Related Genes Are Associated with Osteoporosis and Osteoporotic Vertebral Compression Fractures (OVCFs) in Postmenopausal Women
Source: PubMed Central journal article supplement (PMC7349196; doi:10.3390/genes11060612), 2020-06-02
Supplement: genes-11-00612-s001.pdf [file genes-11-00612-s001.pdf]

**Supplementary table 1. Stratified effects in the 3'-UTR polymorphisms of *CD320*, *TCN2*, *SLC19A1*, and *SLC19A2* genes on osteoporosis risk**

| Variables                 | <i>CD320</i> rs9426 CT+TT |          | <i>TCN2</i> rs10418 CT+TT |          | <i>SLC19A1</i> rs1051296 GT+TT |          | <i>SLC19A2</i> rs16862199 CT+TT |          |
|---------------------------|---------------------------|----------|---------------------------|----------|--------------------------------|----------|---------------------------------|----------|
|                           | AOR (95% CI) <sup>a</sup> | <i>P</i> | AOR (95% CI) <sup>a</sup> | <i>P</i> | AOR (95% CI) <sup>a</sup>      | <i>P</i> | AOR (95% CI) <sup>a</sup>       | <i>P</i> |
| Age (years)               |                           |          |                           |          |                                |          |                                 |          |
| <69                       | 0.815 (0.358-1.860)       | 0.628    | 0.764 (0.359-1.627)       | 0.485    | 3.059 (1.118-8.373)            | 0.030    | 1.182 (0.486-2.877)             | 0.713    |
| ≥69                       | 2.185 (1.021-4.679)       | 0.044    | 1.181 (0.574-2.430)       | 0.652    | 1.173 (0.364-3.779)            | 0.789    | 1.202 (0.578-2.501)             | 0.622    |
| Hypertension              |                           |          |                           |          |                                |          |                                 |          |
| No                        | 1.685 (0.832-3.412)       | 0.147    | 0.770 (0.360-1.646)       | 0.500    | 1.457 (0.505-4.204)            | 0.486    | 2.488 (1.119-5.531)             | 0.025    |
| Yes                       | 0.874 (0.375-2.036)       | 0.755    | 1.345 (0.637-2.840)       | 0.437    | 1.334 (0.455-3.914)            | 0.600    | 0.710 (0.305-1.649)             | 0.425    |
| Diabetes mellitus         |                           |          |                           |          |                                |          |                                 |          |
| No                        | 1.330 (0.744-2.376)       | 0.336    | 0.892 (0.502-1.585)       | 0.696    | 1.766 (0.766-4.073)            | 0.182    | 1.655 (0.891-3.076)             | 0.111    |
| Yes                       | 1.062 (0.273-4.123)       | 0.931    | 1.458 (0.348-6.112)       | 0.606    | 0.132 (0.009-1.930)            | 0.139    | 0.649 (0.179-2.352)             | 0.511    |
| Vitamin B12 <sup>b</sup>  |                           |          |                           |          |                                |          |                                 |          |
| >395 pg/mL                | 1.202 (0.610-2.368)       | 0.596    | 0.846 (0.418-1.712)       | 0.642    | 1.478 (0.725-3.014)            | 0.283    | 1.084 (0.526-2.231)             | 0.827    |
| ≤395 pg/mL                | 1.129 (0.174-7.320)       | 0.899    | 0.716 (0.171-2.995)       | 0.647    | 0.845 (0.168-4.252)            | 0.838    | 2.405 (0.393-14.738)            | 0.343    |
| Folate <sup>b</sup>       |                           |          |                           |          |                                |          |                                 |          |
| >4.59 nmol/L              | 1.379 (0.763-2.490)       | 0.287    | 1.143 (0.651-2.008)       | 0.641    | 1.620 (0.717-3.658)            | 0.246    | 1.569 (0.833-2.955)             | 0.164    |
| ≤4.59 nmol/L              | 1.399 (0.316-6.198)       | 0.658    | 0.718 (0.149-3.463)       | 0.680    | 7.418 (0.418-131.780)          | 0.172    | 1.476 (0.293-7.442)             | 0.637    |
| Homocysteine <sup>b</sup> |                           |          |                           |          |                                |          |                                 |          |
| <12.68 μmol/L             | 0.936 (0.513-1.710)       | 0.830    | 0.890 (0.503-1.576)       | 0.690    | 2.027 (0.901-4.559)            | 0.088    | 1.591 (0.857-2.954)             | 0.142    |
| ≥12.68 μmol/L             | 3.922 (0.970-15.852)      | 0.055    | 1.230 (0.319-4.740)       | 0.763    | 0.348 (0.033-3.657)            | 0.379    | 0.570 (0.153-2.127)             | 0.403    |

AOR, adjusted odds ratio; CI, confidence interval.

<sup>a</sup> The odds ratios were adjusted on the basis of risk factors, such as age, hypertension, and diabetes mellitus.

<sup>b</sup> Cut-offs were set at the bottom 15% for vitamin B12 (395 pg/mL) and folate (4.59 nmol/L) and at the top 15% for homocysteine (12.68 μmol/L) for both osteoporosis patients and controls.

**Supplementary table 2. Stratified effects in the 3'-UTR polymorphisms of *CD320*, *TCN2*, *SLC19A1*, and *SLC19A2* genes on incidence of OVCF**

| Variables                 | <i>CD320</i> rs9426 CT+TT |          | <i>TCN2</i> rs10418 CT+TT |          | <i>SLC19A1</i> rs1051296 GT+TT |          | <i>SLC19A2</i> rs16862199 CT+TT |          |
|---------------------------|---------------------------|----------|---------------------------|----------|--------------------------------|----------|---------------------------------|----------|
|                           | AOR (95% CI) <sup>a</sup> | <i>P</i> | AOR (95% CI) <sup>a</sup> | <i>P</i> | AOR (95% CI) <sup>a</sup>      | <i>P</i> | AOR (95% CI) <sup>a</sup>       | <i>P</i> |
| Age (years)               |                           |          |                           |          |                                |          |                                 |          |
| <69                       | 0.483 (0.181-1.291)       | 0.147    | 0.619 (0.252-1.518)       | 0.295    | 3.662 (1.187-11.299)           | 0.024    | 1.494 (0.594-3.754)             | 0.394    |
| ≥69                       | 3.155 (1.267-7.853)       | 0.014    | 1.004 (0.405-2.494)       | 0.993    | 0.496 (0.209-1.175)            | 0.111    | 1.149 (0.470-2.807)             | 0.761    |
| Hypertension              |                           |          |                           |          |                                |          |                                 |          |
| No                        | 1.790 (0.719-4.459)       | 0.211    | 0.613 (0.218-1.723)       | 0.353    | 0.988 (0.378-2.582)            | 0.981    | 2.921 (1.059-8.056)             | 0.038    |
| Yes                       | 1.055 (0.407-2.735)       | 0.913    | 0.981 (0.405-2.378)       | 0.967    | 0.959 (0.394-2.331)            | 0.926    | 1.016 (0.407-2.536)             | 0.973    |
| Diabetes mellitus         |                           |          |                           |          |                                |          |                                 |          |
| No                        | 1.363 (0.671-2.770)       | 0.392    | 0.684 (0.331-1.414)       | 0.306    | 1.090 (0.531-2.236)            | 0.815    | 2.126 (1.023-4.419)             | 0.043    |
| Yes                       | 1.261 (0.233-6.816)       | 0.788    | 2.268 (0.385-13.350)      | 0.365    | 0.586 (0.119-2.903)            | 0.513    | 0.417 (0.069-2.501)             | 0.338    |
| Vitamin B12 <sup>b</sup>  |                           |          |                           |          |                                |          |                                 |          |
| >395 pg/mL                | 0.596 (0.125-2.854)       | 0.518    | 0.931 (0.239-3.621)       | 0.918    | 1.243 (0.320-4.831)            | 0.753    | 0.736 (0.152-3.569)             | 0.704    |
| ≤395 pg/mL                | 2.052 (0.117-35.864)      | 0.623    | 0.415 (0.031-5.649)       | 0.509    | N/A                            | 0.998    | 6.615 (0.401-109.162)           | 0.187    |
| Folate <sup>b</sup>       |                           |          |                           |          |                                |          |                                 |          |
| >4.59 nmol/L              | 1.097 (0.520-2.315)       | 0.808    | 0.984 (0.482-2.010)       | 0.965    | 1.028 (0.498-2.120)            | 0.942    | 1.575 (0.740-3.351)             | 0.239    |
| ≤4.59 nmol/L              | 2.040 (0.500-8.322)       | 0.320    | 0.413 (0.082-2.073)       | 0.283    | 1.291 (0.296-5.625)            | 0.734    | 0.562 (0.134-2.360)             | 0.431    |
| Homocysteine <sup>b</sup> |                           |          |                           |          |                                |          |                                 |          |
| <12.68 μmol/L             | 0.922 (0.443-1.921)       | 0.829    | 0.707 (0.343-1.461)       | 0.349    | 1.109 (0.549-2.240)            | 0.774    | 2.026 (0.993-4.136)             | 0.052    |
| ≥12.68 μmol/L             | 3.500 (0.795-15.400)      | 0.097    | 1.350 (0.285-6.405)       | 0.706    | 0.518 (0.090-2.997)            | 0.463    | 0.217 (0.037-1.280)             | 0.092    |

AOR, adjusted odds ratio; CI, confidence interval.

<sup>a</sup> Odds ratios were adjusted on the basis of risk factors, such as age, hypertension, and diabetes mellitus.

<sup>b</sup> Cut-offs were set at the bottom 15% for vitamin B12 (395 pg/mL) and folate (4.59 nmol/L) and at the top 15% for homocysteine (12.68 μmol/L) for both
